# Supplementary material for: Analysis of high-depth sequence data for studying viral diversity: a comparison of next generation sequencing platforms using Segminator II
Source: Springer Nature journal article supplement (doi:10.1186/1471-2105-13-47), 2012-03-23
Supplement: 12859_2011_5184_MOESM1_ESM.pdf [file 12859_2011_5184_MOESM1_ESM.pdf]

gp120

scening

Finished

HOME

TABLE

READ

TREE

## Summary

| Site | Cover | Aderine | Thymine | Ganine | Cytosine | Deletion | Con. Nuc | % Non C. | Mean Non Cor Qua... | HPS | Entropy     | Codons                                        |
|------|-------|---------|---------|--------|----------|----------|----------|----------|---------------------|-----|-------------|-----------------------------------------------|
| 528  | 171   | 0       | 158     | 0      | 0        | 13       | T        | 0.0000   | 0.0000              | 6   | 0.10539...  |                                               |
| 529  | 171   | 171     | 0       | 0      | 0        | 0        | A        | 0.0000   | 0.0000              | 6   | -0.0        | ATA:I (166), ATT:I (3), ATG:M (2),            |
| 530  | 171   | 0       | 171     | 0      | 0        | 0        | T        | 0.0000   | 0.0000              | 0   | -0.0        |                                               |
| 531  | 171   | 165     | 3       | 2      | 0        | 0        | A        | 2.9240   | 0.0000              | 0   | 0.21095...  |                                               |
| 532  | 171   | 4       | 0       | 167    | 0        | 0        | G        | 2.3302   | 59.3114             | 1   | 0.160082... | CCC:A (164), AGC:G (3), GTC:V (2), ACC:T (1), |
| 533  | 171   | 1       | 2       | 3      | 165      | 0        | C        | 3.5088   | 61.9000             | 2   | 0.720495... |                                               |
| 534  | 177   | 0       | 0       | 0      | 177      | 0        | C        | 0.0000   | 0.0000              | 2   | -0.0        |                                               |
| 535  | 181   | 0       | 181     | 0      | 0        | 0        | T        | 0.0000   | 0.0000              | 0   | -0.0        | TTG:L (180), TCG:S (.),                       |
| 536  | 181   | 0       | 180     | 0      | 1        | 0        | T        | 0.5525   | 0.0000              | 1   | 0.049384... |                                               |
| 537  | 181   | 0       | 0       | 181    | 0        | 0        | G        | 0.0000   | 0.0000              | 1   | -0.0        |                                               |
| 538  | 182   | 182     | 0       | 0      | 0        | 0        | A        | 0.0000   | 0.0000              | 0   | -0.0        | ATA:I (181), ATG:M (1),                       |
| 539  | 182   | 0       | 183     | 0      | 0        | 0        | T        | 0.0000   | 0.0000              | 0   | -0.0        |                                               |
| 540  | 196   | 195     | 0       | 1      | 0        | 0        | A        | 0.5102   | 0.0000              | 0   | 0.046192... |                                               |
| 541  | 197   | 0       | 197     | 0      | 0        | 0        | T        | 0.0000   | 0.0000              | 0   | -0.0        | TAG:* (196), TAA:* (.),                       |
| 542  | 197   | 197     | 0       | 0      | 0        | 0        | A        | 0.0000   | 0.0000              | 0   | -0.0        |                                               |
| 543  | 197   | 1       | 0       | 196    | 0        | 0        | G        | 0.5076   | 59.3067             | 1   | 0.045395... |                                               |
| 544  | 202   | 0       | 203     | 0      | 0        | 0        | T        | 0.0000   | 0.0000              | 1   | -0.0        | TAC:Y (203),                                  |
| 545  | 208   | 208     | 0       | 0      | 0        | 0        | A        | 0.0000   | 0.0000              | 0   | -0.0        |                                               |
| 546  | 212   | 0       | 0       | 0      | 2.2      | 0        | C        | 0.0000   | 0.0000              | 0   | -0.0        |                                               |
| 547  | 214   | 13      | 1       | 0      | 200      | 0        | C        | 6.5421   | 61.1429             | 1   | 0.372883... | CAA:Q (195), AAA:K (13), TAA:* (1),           |
| 548  | 216   | 215     | 0       | 0      | 0        | 0        | A        | 0.0000   | 0.0000              | 1   | -0.0        |                                               |
| 549  | 216   | 215     | 0       | 1      | 0        | 0        | A        | 0.4630   | 0.0000              | 1   | 0.042565... |                                               |
| 550  | 216   | 0       | 218     | 0      | 0        | 0        | T        | 0.0000   | 0.0000              | 1   | -0.0        | TAG:* (218),                                  |
| 551  | 216   | 215     | 0       | 0      | 0        | 0        | A        | 0.0000   | 0.0000              | 0   | -0.0        |                                               |

REFERENCE: TAACAAATAGATAATGATACTACCAAGCTAATAGTGTGACCAAGTTGTAACACCTCAGTCAATACACAGGCTGTCCAAAAGGTATCCFTT5AG6CAATTCCCATACAT7AT1GTGCCCGGCTG5PTTFTGCGA  
COVER:   
NON-CONSENSUS:   
ENTROPY:   
INSERTIONS (len.1):   
DELETIONS (len.1):   
530 540 550 560 570 580 590 600 610 620 630 640 650 660 670  
0  100%

## Tree Scan

Unique Tips: 28

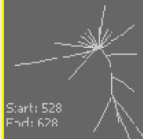Window  100Mag.  174% Depth  20

Create Full Pairwise Tree

## Dataset Summary

No. Reads Mapped: 3953

Forward Mapped: 2110

Reverse Mapped: 1843

Mean Read Length: 194

## Table Scan

Frame  1Non Con.  0.05Quality  10HPS Len.  3

SAVE TABLE

Incel len.  1
