# Supplementary material for: Analysis of high-depth sequence data for studying viral diversity: a comparison of next generation sequencing platforms using Segminator II
Source: Springer Nature journal article supplement (doi:10.1186/1471-2105-13-47), 2012-03-23
Supplement: 12859_2011_5184_MOESM2_ESM.pdf [file 12859_2011_5184_MOESM2_ESM.pdf]

# Profiling

template

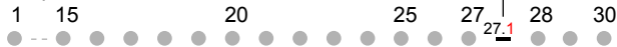

Insertion  
character: ●  
site index: 27  
insertion point: 1  
quality: q11

Deletion  
character: -  
site index: 19  
insertion point: 0  
quality: null

Mismatch  
character: ●  
site index: 26  
insertion point: 0  
quality: q9

Deletion

Mismatch

## Stored Read

unique id: int  
template start index: 18  
template end index: 30  
differences:
