# Supplementary material for: Analysis of high-depth sequence data for studying viral diversity: a comparison of next generation sequencing platforms using Segminator II
Source: Springer Nature journal article supplement (doi:10.1186/1471-2105-13-47), 2012-03-23

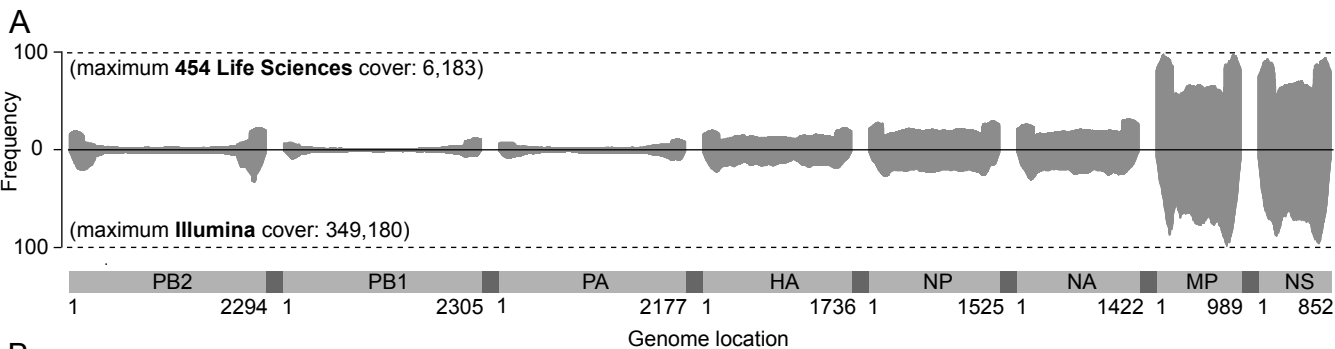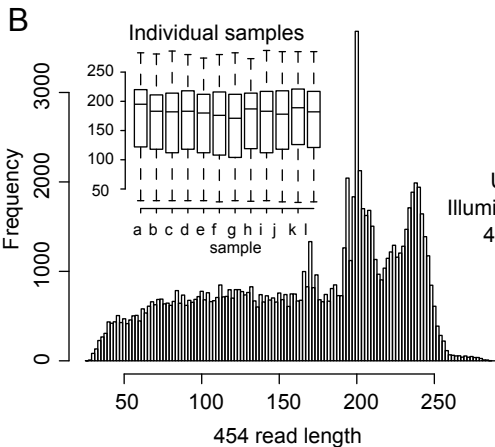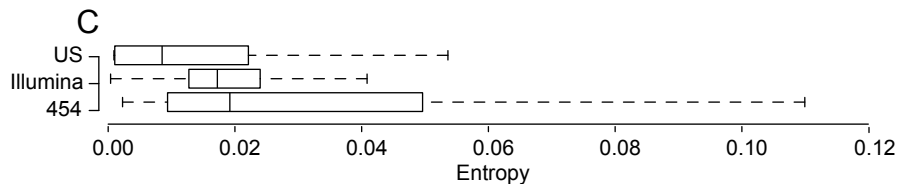

Supplement: 12859_2011_5184_MOESM4_ESM.pdf [file 12859_2011_5184_MOESM4_ESM.pdf]
